# Supplementary material
Source: PubMed Central journal article supplement (PMC7205875)
Supplement: 41418_2019_352_MOESM1_ESM.pdf [file 41418_2019_352_MOESM1_ESM.pdf]

## Supplementary Figure 1

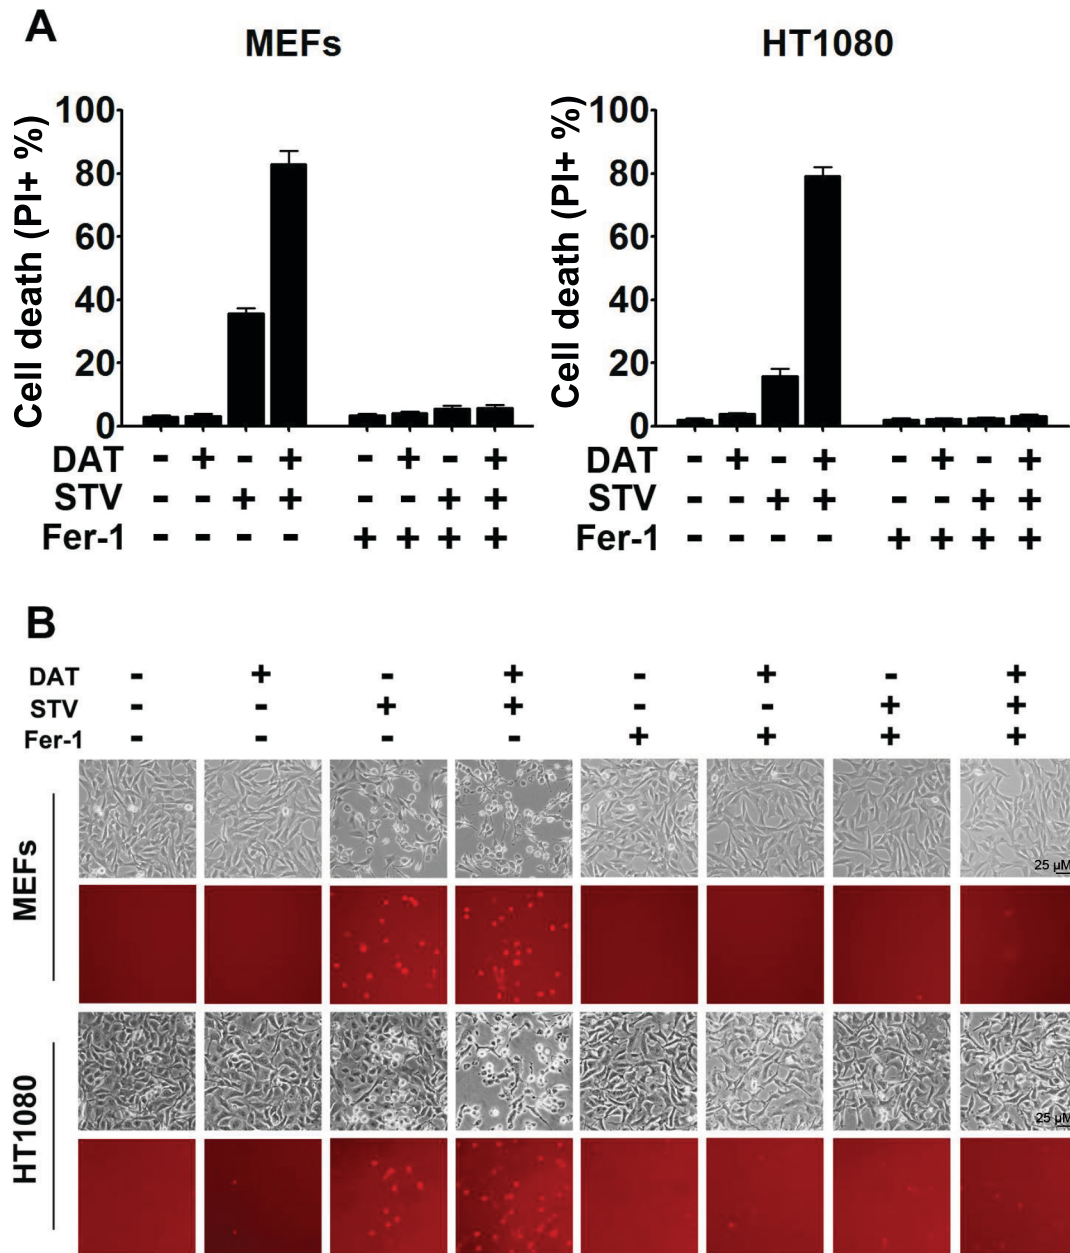

**S1.** DAT enhances the sensitivity of cells to cystine starvation-induced ferroptosis. Ferroptosis was induced in MEF and HT1080 by cystine starvation (STV) for 8 and 10 hours respectively with or without 10  $\mu$ M DAT or 1  $\mu$ M Ferrostatin-1. In A, flow cytometric quantification of PI-positive ferroptotic MEF and HT1080 cells. In B, upper panels show phase-contrast images and the lower panels show PI staining to indicate dead cells at 10X magnification.
