# Supplementary material
Source: PubMed Central journal article supplement (PMC7205875)
Supplement: 41418_2019_352_MOESM2_ESM.pdf [file 41418_2019_352_MOESM2_ESM.pdf]

## Supplementary Figure 2

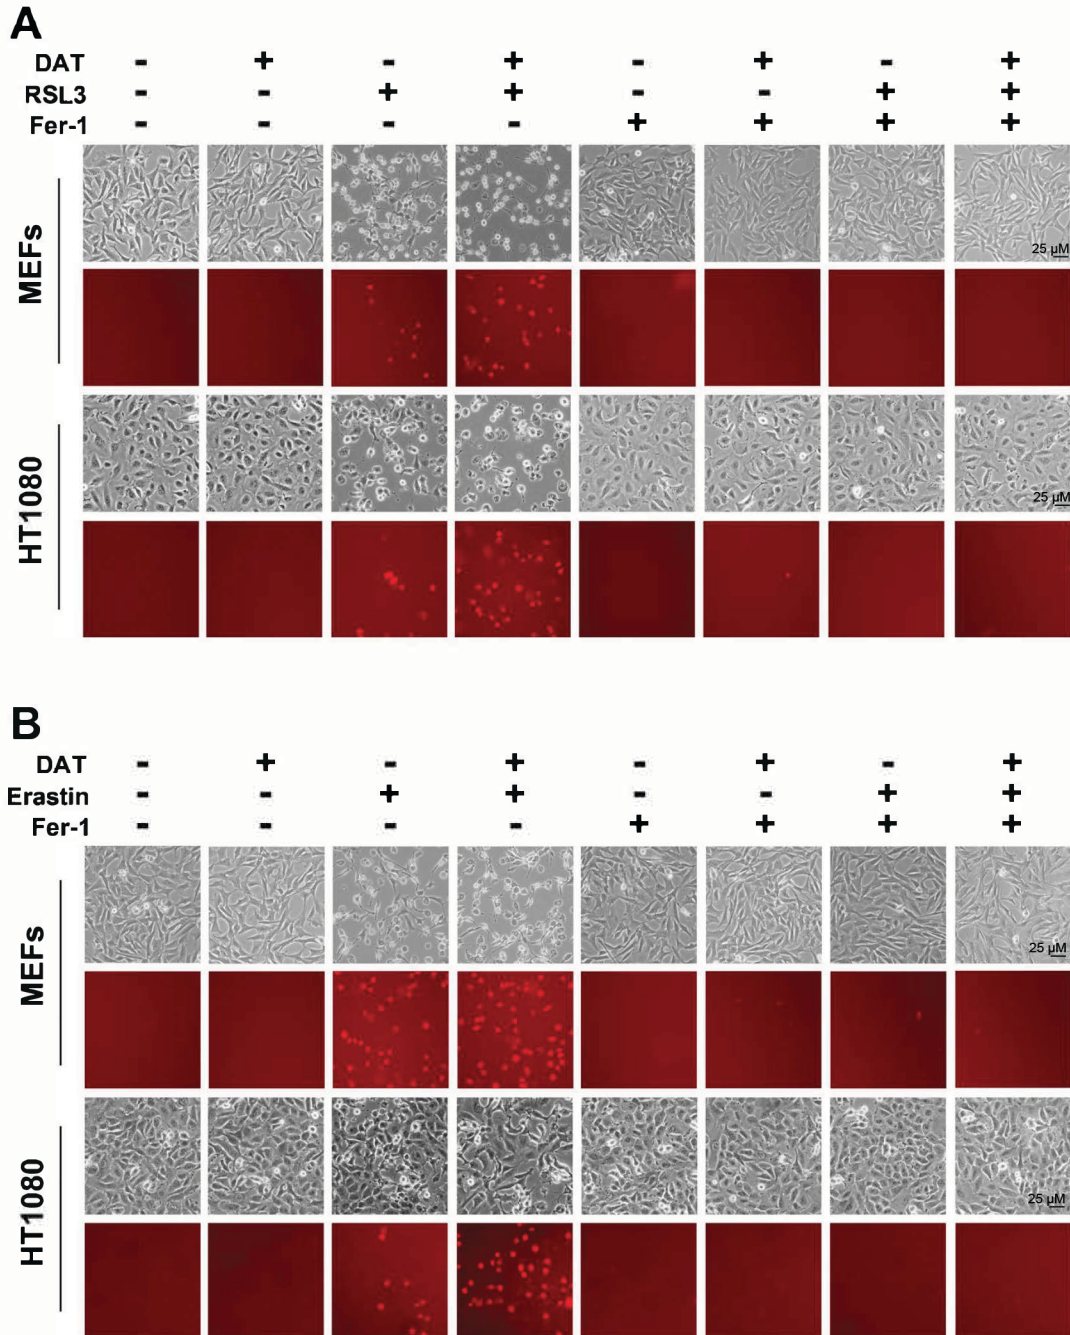

**S2.** DAT enhances the sensitivity of cells to RSL3 and erastin-induced ferroptosis. A. MEF and HT1080 cells were treated with 0.5  $\mu$ M of RSL3 for 7 hours. B. MEF cells were treated with 1  $\mu$ M erastin for 10 hours and HT1080 for 12 hours. For A and B, 10  $\mu$ M of DAT was used. Upper panels show phase-contrast images and the lower panels show PI staining to indicate dead cells at 10X magnification.
