# Supplementary material
Source: PubMed Central journal article supplement (PMC7205875)
Supplement: 41418_2019_352_MOESM3_ESM.pdf [file 41418_2019_352_MOESM3_ESM.pdf]

### Supplementary Figure 3

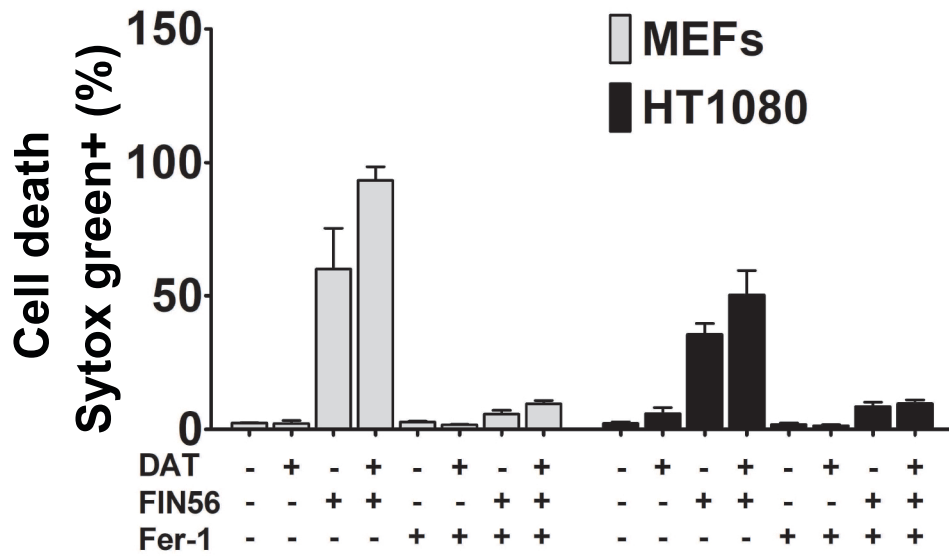

**S3.** DAT enhances the sensitivity of cells to FIN56-induced ferroptosis. Ferroptosis was induced in MEF and HT1080 by 5  $\mu$ M FIN56 for 8 hours with or without 10  $\mu$ M DAT or 1  $\mu$ M Ferrostatin-1. The percentage of Sytox-positive cells were quantified as a representation of cell death.
