# Supplementary material
Source: PubMed Central journal article supplement (PMC7205875)
Supplement: 41418_2019_352_MOESM4_ESM.pdf [file 41418_2019_352_MOESM4_ESM.pdf]

## Supplementary Figure 4

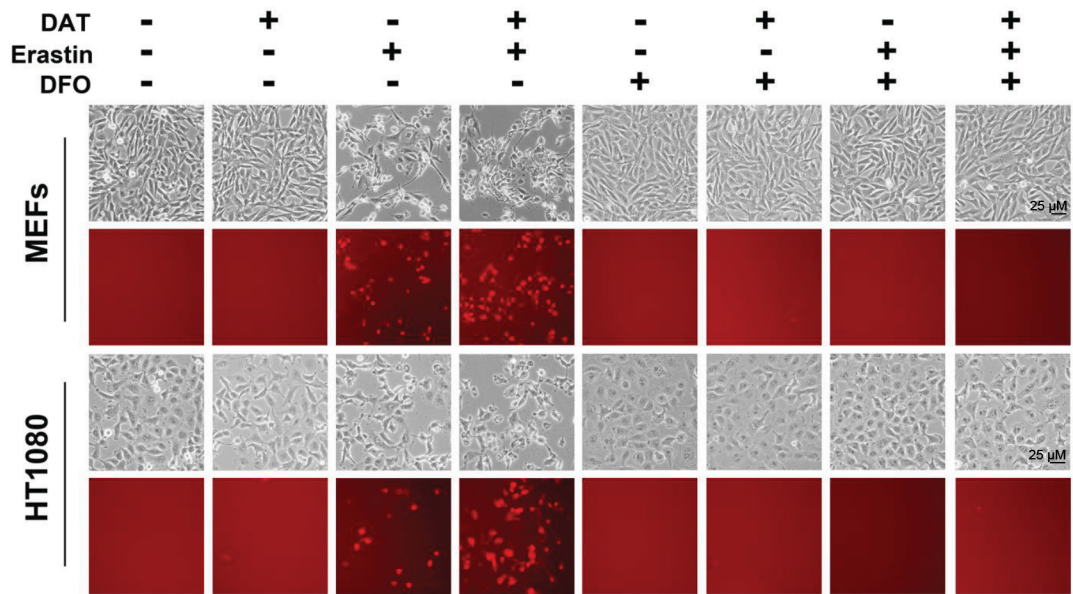

**S4.** DFO suppressed erastin-induced ferroptosis. MEFs were treated with 1  $\mu$ M erastin for 8 hours and HT1080 for 10 hours with or without 10  $\mu$ M DAT and 80  $\mu$ M of DFO. Upper panels show phase-contrast images and the lower panels show PI staining to indicate dead cells at 10X magnification.
