# Supplementary material
Source: PubMed Central journal article supplement (PMC7205875)
Supplement: 41418_2019_352_MOESM5_ESM.pdf [file 41418_2019_352_MOESM5_ESM.pdf]

## Supplementary Figure 5

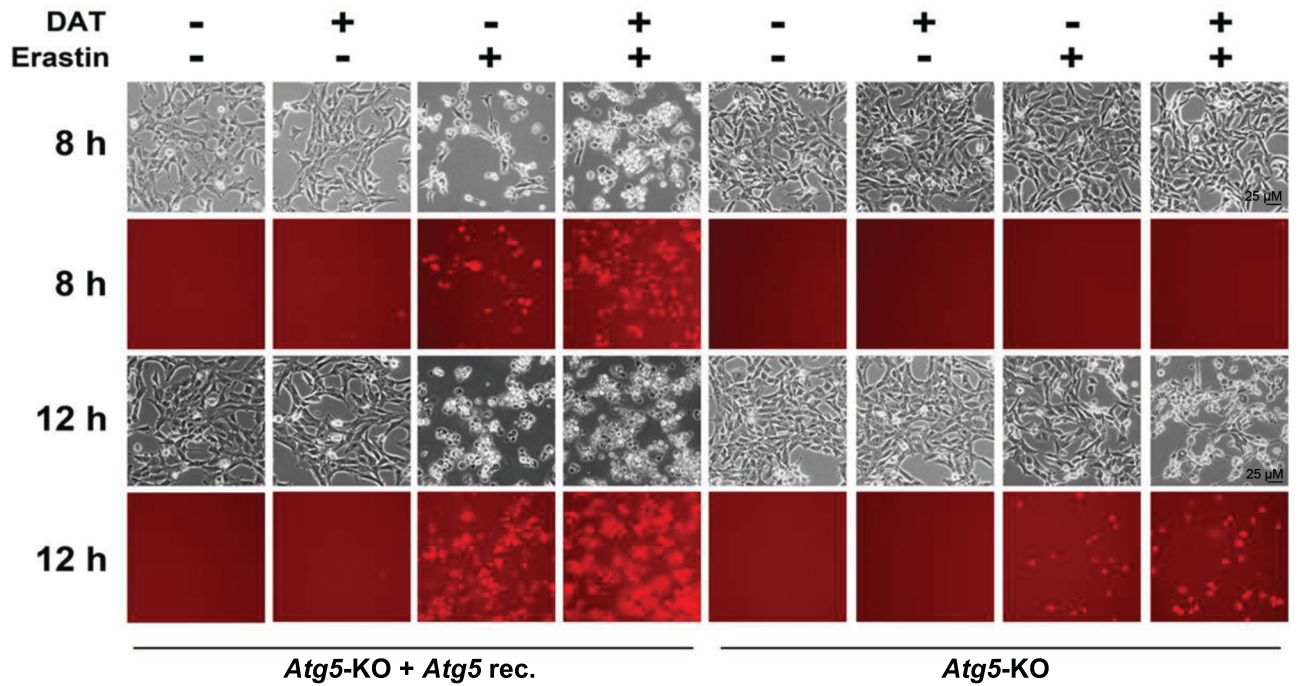

**S5.** DAT sensitizes cells to ferroptosis independent of autophagy. *Atg5-KO* and *Atg5-KO* reconstituted with *Atg5* were treated with 1  $\mu$ M erastin with or without 10  $\mu$ M DAT for the indicated times. Upper panels show phase-contrast images and the lower panels show PI staining to indicate dead cells at 10X magnification.
