# Supplementary material
Source: PubMed Central journal article supplement (PMC7205875)
Supplement: 41418_2019_352_MOESM6_ESM.pdf [file 41418_2019_352_MOESM6_ESM.pdf]

## Supplementary Figure 6

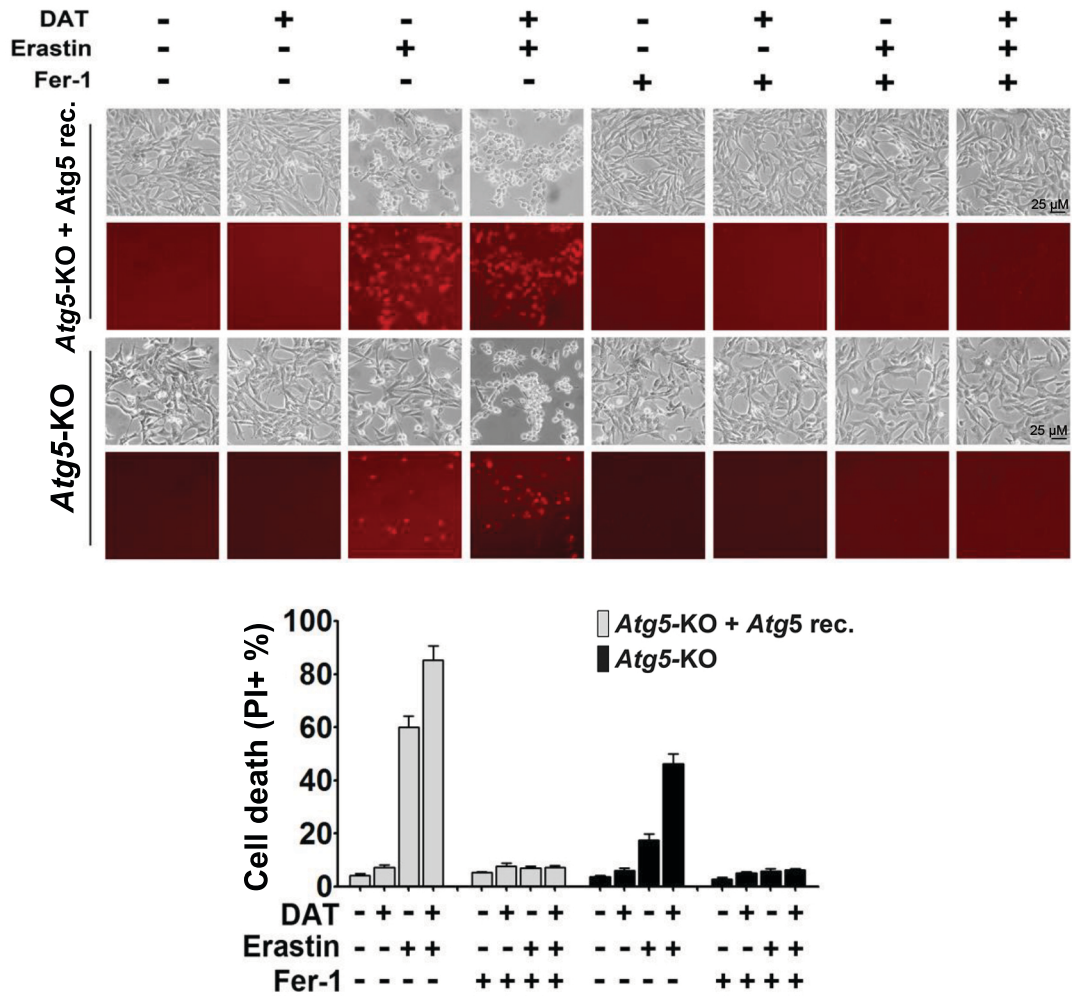

**S6.** Ferrostatin-1 blocked erastin-induced ferroptosis in autophagy-deficient and autophagy-competent cells. *Atg5-KO* and *Atg5-KO* reconstituted with *Atg5* were treated with 1  $\mu$ M erastin with or without 10  $\mu$ M DAT or 1  $\mu$ M Ferrostatin-1. Upper panel shows phase-contrast images and PI staining to indicate dead cells at 10X magnification. Lower panel shows flow cytometry quantification of PI-positive cells.
