# Supplementary material
Source: PubMed Central journal article supplement (PMC7205875)
Supplement: 41418_2019_352_MOESM7_ESM.pdf [file 41418_2019_352_MOESM7_ESM.pdf]

## Supplementary Figure 7

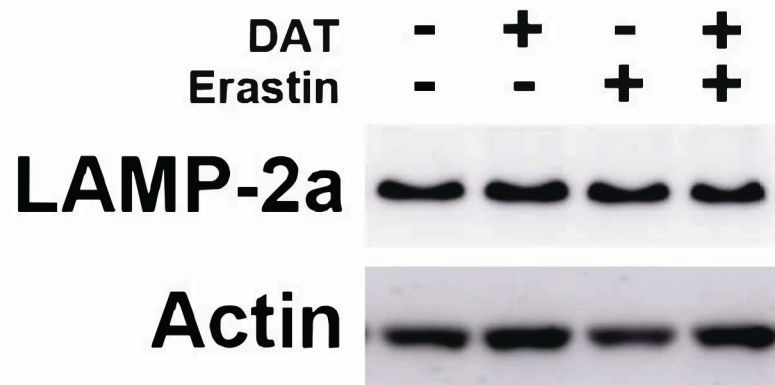

**S7.** DAT does not induce Lamp2a degradation. Western blot analysis of Lamp2a protein expression in MEF cells following treatment with 1  $\mu$ M erastin with or without 10  $\mu$ M DAT for 10 hours.  $\beta$ -Actin was used as a loading control.
